# Supplementary material for: Residents' perceptions of a night float system
Source: PubMed Central journal article supplement (PMC2728710; doi:10.1186/1472-6920-9-52), 2009-08-03
Supplement: 1472-6920-9-52-S1.pdf [file 1472-6920-9-52-S1.pdf]

# The Night Float Rotation Evaluation Survey

## Preliminary Information

Please indicate your level of training:

- Intern (PGY-1)
- Junior Resident (PGY-2)
- Senior Resident (PGY-3)
- Other (specify) \_\_\_\_\_

Have you done the night float rotation?

**No.** Select a hospital whose night float rotation you are most familiar with to use as a comparison to your call month experience when filling out the survey.

MUH                       VA                       Shadyside

**Yes.** Please specify the location. If you have completed the night float rotation at more than one hospital, please select only **one** hospital to use as a comparison to your call month experience when filling out the survey.

MUH                       VA                       Shadyside

## I. Patient Care

| <b><i>Compared to <u>nights</u> on an average call month, during the night float rotation:</i></b> | Strongly Disagree | Disagree | About Equal | Agree | Strongly Agree |
|----------------------------------------------------------------------------------------------------|-------------------|----------|-------------|-------|----------------|
| The overall quality of patient care is improved                                                    | 1                 | 2        | 3           | 4     | 5              |
| Better care is provided by a rested physician who is less familiar with the patient                | 1                 | 2        | 3           | 4     | 5              |
| Better care is provided by a tired physician who is familiar with the patient                      | 1                 | 2        | 3           | 4     | 5              |
| The shared decision-making between the day team and the night float team improves patient care     | 1                 | 2        | 3           | 4     | 5              |
| Continuity of patient care is maintained                                                           | 1                 | 2        | 3           | 4     | 5              |
| “Sign-out” about previously admitted patients is adequate                                          | 1                 | 2        | 3           | 4     | 5              |
| The physician-patient relationship is worsened                                                     | 1                 | 2        | 3           | 4     | 5              |
| Patients are more confused as to who is their primary physician                                    | 1                 | 2        | 3           | 4     | 5              |
| Patients are more satisfied with their care                                                        | 1                 | 2        | 3           | 4     | 5              |
| Overall patient care is less costly                                                                | 1                 | 2        | 3           | 4     | 5              |
| The length of stay for patients admitted overnight is decreased                                    | 1                 | 2        | 3           | 4     | 5              |
| There are fewer adverse patient outcomes                                                           | 1                 | 2        | 3           | 4     | 5              |

## II. Personal Aspects

| <b><i>Compared to an average call month, during the night float rotation:</i></b> | Strongly Disagree | Disagree | About Equal | Agree | Strongly Agree |
|-----------------------------------------------------------------------------------|-------------------|----------|-------------|-------|----------------|
| One’s mood is better                                                              | 1                 | 2        | 3           | 4     | 5              |
| One feels less stressed                                                           | 1                 | 2        | 3           | 4     | 5              |
| One feels less isolated                                                           | 1                 | 2        | 3           | 4     | 5              |
| One is more well-rested                                                           | 1                 | 2        | 3           | 4     | 5              |
| One is more motivated                                                             | 1                 | 2        | 3           | 4     | 5              |
| The quality of one’s time outside the hospital is better                          | 1                 | 2        | 3           | 4     | 5              |
| Family/personal life suffers                                                      | 1                 | 2        | 3           | 4     | 5              |
| One is more likely to develop a “shift-work” mentality                            | 1                 | 2        | 3           | 4     | 5              |
| One feels less of a sense of responsibility                                       | 1                 | 2        | 3           | 4     | 5              |

### III. Working Environment/Resources

| <i>Compared to <u>nights</u> on an average call month, during the night float rotation:</i> | Strongly Disagree | Disagree | About Equal | Agree | Strongly Agree |
|---------------------------------------------------------------------------------------------|-------------------|----------|-------------|-------|----------------|
|---------------------------------------------------------------------------------------------|-------------------|----------|-------------|-------|----------------|

|                                                                  |   |   |   |   |   |
|------------------------------------------------------------------|---|---|---|---|---|
| One is more efficient                                            | 1 | 2 | 3 | 4 | 5 |
| One spends more time on writing progress notes and orders        | 1 | 2 | 3 | 4 | 5 |
| One spends less time on non-patient related tasks                | 1 | 2 | 3 | 4 | 5 |
| One orders fewer lab tests                                       | 1 | 2 | 3 | 4 | 5 |
| One orders fewer consults                                        | 1 | 2 | 3 | 4 | 5 |
| One manages health care resources more cost-effectively          | 1 | 2 | 3 | 4 | 5 |
| Nursing staff is more likely to be available                     | 1 | 2 | 3 | 4 | 5 |
| Nursing/housestaff relationships are better                      | 1 | 2 | 3 | 4 | 5 |
| One has a more difficult time contacting the covering attendings | 1 | 2 | 3 | 4 | 5 |
| The day team signs out inappropriate tasks to be completed       | 1 | 2 | 3 | 4 | 5 |
| The overall workload is generally less                           | 1 | 2 | 3 | 4 | 5 |
| The number of patients admitted per night is too many            | 1 | 2 | 3 | 4 | 5 |
| The patient to intern ratio is less manageable                   | 1 | 2 | 3 | 4 | 5 |
| One has more autonomy                                            | 1 | 2 | 3 | 4 | 5 |

|                                                                                                                              |   |   |   |   |   |
|------------------------------------------------------------------------------------------------------------------------------|---|---|---|---|---|
| There is sufficient “backup”                                                                                                 | 1 | 2 | 3 | 4 | 5 |
| If you <b>Disagree</b> or <b>Strongly Disagree</b> with the above statement, then there is <b>not</b> enough “back-up” from: |   |   |   |   |   |
| Residents                                                                                                                    | 1 | 2 | 3 | 4 | 5 |
| Fellows                                                                                                                      | 1 | 2 | 3 | 4 | 5 |
| Attendings                                                                                                                   | 1 | 2 | 3 | 4 | 5 |
| Sub-specialty services (e.g. surgery, ortho)                                                                                 | 1 | 2 | 3 | 4 | 5 |
| Other (please specify):                                                                                                      |   |   |   |   |   |

### IV. Miscellaneous

|                                                                                          | Strongly Disagree | Disagree | About Equal | Agree | Strongly Agree |
|------------------------------------------------------------------------------------------|-------------------|----------|-------------|-------|----------------|
| With reference to our current night float system (residents admit; interns cross-cover): |                   |          |             |       |                |
| Keep it as it is                                                                         | 1                 | 2        | 3           | 4     | 5              |
| Interns should also admit patients (in addition to cross-coverage)                       | 1                 | 2        | 3           | 4     | 5              |
| Residents should also cross-cover (in addition to admitting)                             | 1                 | 2        | 3           | 4     | 5              |
| It should continue to count as a call month                                              | 1                 | 2        | 3           | 4     | 5              |

|                                                                                         |  |  |  |  |  |
|-----------------------------------------------------------------------------------------|--|--|--|--|--|
| If you have <b>done</b> the night float rotation:                                       |  |  |  |  |  |
| On average, about how many hours of sleep per <b>night</b> did you get in the hospital? |  |  |  |  |  |
| On average, about how many hours of sleep did you get during the <b>day</b> ?           |  |  |  |  |  |

## V. Medical Errors

Please select the setting in which more medical errors have been made (by you or someone else) due to:

|                                                           | <b>Night<br/>Float</b> | <b>Call<br/>Night</b> | <b>About<br/>Equal</b> | <b>Neither</b> |
|-----------------------------------------------------------|------------------------|-----------------------|------------------------|----------------|
| Fatigue from lack of sleep                                | 1                      | 2                     | 3                      | 4              |
| Fatigue from excessive work load                          | 1                      | 2                     | 3                      | 4              |
| Poor communication (sign-out) from day team               | 1                      | 2                     | 3                      | 4              |
| Inadequate clerical/administrative support                | 1                      | 2                     | 3                      | 4              |
| Inadequate ancillary support (i.e. phlebotomy, transport) | 1                      | 2                     | 3                      | 4              |
| Inadequate nursing support                                | 1                      | 2                     | 3                      | 4              |
| Inadequate supervision by residents                       | 1                      | 2                     | 3                      | 4              |
| Inadequate supervision by attendings                      | 1                      | 2                     | 3                      | 4              |
| Insufficient clinical knowledge                           | 1                      | 2                     | 3                      | 4              |
| Incorrect prescribing of medications                      | 1                      | 2                     | 3                      | 4              |
| Delay in ordering a diagnostic test                       | 1                      | 2                     | 3                      | 4              |
| Delay in correcting abnormal electrolyte values           | 1                      | 2                     | 3                      | 4              |
| Delay in performing procedures that needed to be done     | 1                      | 2                     | 3                      | 4              |
| Decreased availability of radiological tests              | 1                      | 2                     | 3                      | 4              |
| Decreased availability of lab tests                       | 1                      | 2                     | 3                      | 4              |

## VI. Learning Environment

| <b><i>Compared to <u>nights</u> on an average call month, during the night float rotation:</i></b> | Strongly Disagree | Disagree | About Equal | Agree | Strongly Agree |
|----------------------------------------------------------------------------------------------------|-------------------|----------|-------------|-------|----------------|
|----------------------------------------------------------------------------------------------------|-------------------|----------|-------------|-------|----------------|

|                                                                                                                                            |   |   |   |   |   |
|--------------------------------------------------------------------------------------------------------------------------------------------|---|---|---|---|---|
| There is more emphasis on education                                                                                                        | 1 | 2 | 3 | 4 | 5 |
| There is more emphasis on service                                                                                                          | 1 | 2 | 3 | 4 | 5 |
| One has more time for reading                                                                                                              | 1 | 2 | 3 | 4 | 5 |
| One has more free time (“down-time”)                                                                                                       | 1 | 2 | 3 | 4 | 5 |
| One has more opportunities for learning                                                                                                    | 1 | 2 | 3 | 4 | 5 |
| The range of diagnoses of newly admitted patients is adequate                                                                              | 1 | 2 | 3 | 4 | 5 |
| Newly admitted patients have more acute issues                                                                                             | 1 | 2 | 3 | 4 | 5 |
| One is less likely to learn about the full impact of patient interventions                                                                 | 1 | 2 | 3 | 4 | 5 |
| One is less likely to learn about the evolution of disease processes                                                                       | 1 | 2 | 3 | 4 | 5 |
| There are more “inappropriate” admissions                                                                                                  | 1 | 2 | 3 | 4 | 5 |
| If you answered <b>Agree</b> or <b>Strongly Agree</b> to the item above, please list the diagnoses designated as inappropriate admissions: |   |   |   |   |   |

|                                                                                                                           |   |   |   |   |   |
|---------------------------------------------------------------------------------------------------------------------------|---|---|---|---|---|
| There is <b>sufficient</b> teaching                                                                                       | 1 | 2 | 3 | 4 | 5 |
| If you <b>Disagree</b> or <b>Strongly Disagree</b> with the above statement, then there is <b>not</b> enough teaching by: |   |   |   |   |   |
| Resident to intern                                                                                                        | 1 | 2 | 3 | 4 | 5 |
| Attending to intern                                                                                                       | 1 | 2 | 3 | 4 | 5 |
| Attending to resident                                                                                                     | 1 | 2 | 3 | 4 | 5 |
| Other (please specify):                                                                                                   |   |   |   |   |   |

|                                   |   |   |   |   |   |
|-----------------------------------|---|---|---|---|---|
| Education is impaired by:         |   |   |   |   |   |
| Fatigue                           | 1 | 2 | 3 | 4 | 5 |
| Excessive work load               | 1 | 2 | 3 | 4 | 5 |
| Lack of time                      | 1 | 2 | 3 | 4 | 5 |
| Lack of conferences               | 1 | 2 | 3 | 4 | 5 |
| Absence of an attending physician | 1 | 2 | 3 | 4 | 5 |
| Other (please specify):           |   |   |   |   |   |

|                                                             |   |   |   |   |   |
|-------------------------------------------------------------|---|---|---|---|---|
| The learning environment could be improved by:              |   |   |   |   |   |
| Scheduled night time attending rounds                       | 1 | 2 | 3 | 4 | 5 |
| Scheduled night time conferences                            | 1 | 2 | 3 | 4 | 5 |
| An “evening report” (to start before the night float shift) | 1 | 2 | 3 | 4 | 5 |
| Independent study with computer-based cases/curriculum      | 1 | 2 | 3 | 4 | 5 |

## VII. Education

| <i>In general, I like:</i>    | Strongly Disagree | Disagree | About Equal | Agree | Strongly Agree |
|-------------------------------|-------------------|----------|-------------|-------|----------------|
| Independent study             | 1                 | 2        | 3           | 4     | 5              |
| Noon conferences              | 1                 | 2        | 3           | 4     | 5              |
| Attending rounds              | 1                 | 2        | 3           | 4     | 5              |
| Grand rounds                  | 1                 | 2        | 3           | 4     | 5              |
| Morning report                | 1                 | 2        | 3           | 4     | 5              |
| Reading a textbook            | 1                 | 2        | 3           | 4     | 5              |
| Looking up things on UpToDate | 1                 | 2        | 3           | 4     | 5              |
| Other (please specify):       |                   |          |             |       |                |

## VIII. Interpersonal-Communication Skills

| <i>Compared to <u>nights</u> on an average call month, during the night float rotation:</i> | Strongly Disagree | Disagree | About Equal | Agree | Strongly Agree |
|---------------------------------------------------------------------------------------------|-------------------|----------|-------------|-------|----------------|
| One is less likely to thoroughly explain things (e.g. exams, treatment options) to patients | 1                 | 2        | 3           | 4     | 5              |
| One is less likely to use open-ended questions when interviewing patients                   | 1                 | 2        | 3           | 4     | 5              |
| One is less likely to give patients an opportunity to talk and ask questions                | 1                 | 2        | 3           | 4     | 5              |
| One communicates more effectively with patients and their families                          | 1                 | 2        | 3           | 4     | 5              |
| One is less likely to be empathetic towards the patients                                    | 1                 | 2        | 3           | 4     | 5              |
| One is not as sensitive to the patient's immediate physical needs                           | 1                 | 2        | 3           | 4     | 5              |
| One is not as sensitive to the patient's immediate emotional needs                          | 1                 | 2        | 3           | 4     | 5              |
| One is less able to put patients at ease                                                    | 1                 | 2        | 3           | 4     | 5              |
| One is more likely to rush or spend too little time with the patients                       | 1                 | 2        | 3           | 4     | 5              |
| One is less thorough in the workup of newly admitted patients                               | 1                 | 2        | 3           | 4     | 5              |
| It is difficult to sign off the patients admitted overnight                                 | 1                 | 2        | 3           | 4     | 5              |
| It is more difficult to take care of the terminally ill                                     | 1                 | 2        | 3           | 4     | 5              |
| It is more difficult to obtain an appropriate informed consent                              | 1                 | 2        | 3           | 4     | 5              |
| One faces more ethical dilemmas                                                             | 1                 | 2        | 3           | 4     | 5              |
| It is more difficult to manage a patient who has been deemed incompetent                    | 1                 | 2        | 3           | 4     | 5              |

## IX. Overall Thoughts

|                                                                                             | Strongly Disagree | Disagree | About Equal | Agree | Strongly Agree |
|---------------------------------------------------------------------------------------------|-------------------|----------|-------------|-------|----------------|
| Overall, my call month experience is improved by night float                                | 1                 | 2        | 3           | 4     | 5              |
| I am more rested during my call month because of night float                                | 1                 | 2        | 3           | 4     | 5              |
| I learn more during my call month because of night float                                    | 1                 | 2        | 3           | 4     | 5              |
| I am happier during my call month because of night float                                    | 1                 | 2        | 3           | 4     | 5              |
| The night float rotation has more educational value compared with the overnight call system | 1                 | 2        | 3           | 4     | 5              |
| Overall, the night float rotation is a very valuable rotation                               | 1                 | 2        | 3           | 4     | 5              |
| I am satisfied with the current night float rotation                                        | 1                 | 2        | 3           | 4     | 5              |
| I prefer the traditional overnight call system                                              | 1                 | 2        | 3           | 4     | 5              |
| I support the 80-hour work week requirement                                                 | 1                 | 2        | 3           | 4     | 5              |

Please write down any additional concerns/thoughts that you might have with the night float rotation. For example, what are the best features? What would you like to change?

---



---



---



---



---



---



---



---



---



---



---



---



---



---



---



---



---



---



---



---



---



---

Thank you **very much** for completing the questionnaire.
